# Supplementary material for: Immune and Metabolic Signatures in Long-COVID: A Multi-Omics Pilot Study in Non-Hospitalized Healthcare Workers.
Source: Research Square preprint supplement (doi:10.21203/rs.3.rs-7992692/v1), 2025-12-03
Supplement: Supplementary file 1 [file ccc3f33f027d87f68c28e0fb.docx]

**Supplementary Table 1. Differentially expressed genes in LC cases compared to controls (FDR < 0.10) by limma.**

| **Gene** | **Full Name** | **Log Fold Change** | **P value** | **FDR** |
| --- | --- | --- | --- | --- |
| *ABL1* | c-abl oncogene 1, non-receptor tyrosine kinase | -0.338 | <.001 | 0.017 |
| *ADGRE5* | CD97 molecule | -0.432 | <.001 | 0.029 |
| *ANXA1* | annexin A1 | 0.586 | <.001 | 0.017 |
| *APP* | amyloid beta (A4) precursor protein | -0.498 | <.001 | 0.029 |
| *ATF2* | activating transcription factor 2 | 0.226 | <.001 | 0.017 |
| *ATG5* | autophagy related 5 | 0.361 | <.001 | 0.029 |
| *BATF* | basic leucine zipper transcription factor, ATF-like | 0.303 | 0.004 | 0.072 |
| *BID* | BH3 interacting domain death agonist | 0.292 | 0.008 | 0.099 |
| *BMI1* | BMI1 polycomb ring finger oncogene | 0.239 | 0.008 | 0.097 |
| *BTLA* | B and T lymphocyte associated | 0.400 | 0.001 | 0.034 |
| *CD163* | CD163 molecule | -0.702 | <.001 | 0.029 |
| *CD164* | CD164 molecule, sialomucin | 0.276 | 0.004 | 0.069 |
| *CD2* | CD2 molecule | 0.247 | 0.007 | 0.096 |
| *CD37* | CD37 molecule | -0.291 | 0.003 | 0.058 |
| *CD3D* | CD3d molecule, delta (CD3-TCR complex) | 0.521 | <.001 | 0.023 |
| *CD4* | CD4 molecule | -0.362 | 0.003 | 0.056 |
| *CD47* | CD47 molecule | 0.261 | <.001 | 0.029 |
| *CD48* | CD48 molecule | 0.435 | 0.002 | 0.044 |
| *CD5* | CD5 molecule | -0.271 | 0.005 | 0.078 |
| *CD58* | CD58 molecule | 0.417 | <.001 | 0.014 |
| *CD7* | CD7 molecule | -0.395 | <.001 | 0.017 |
| *CD74* | CD74 molecule, major histocompatibility complex, class II invariant chain | -0.320 | 0.004 | 0.066 |
| *CSF1* | colony stimulating factor 1 (macrophage) | -0.445 | 0.003 | 0.059 |
| *GPI* | glucose-6-phosphate isomerase | -0.299 | <.001 | 0.029 |
| *HLA-A* | major histocompatibility complex, class I, A | -0.298 | 0.005 | 0.081 |
| *HLA-B* | major histocompatibility complex, class I, B | -0.390 | <.001 | 0.017 |
| *HLA-E* | major histocompatibility complex, class I, E | -0.266 | 0.002 | 0.044 |
| *HMGB1* | high mobility group box 1 | 0.350 | 0.002 | 0.046 |
| *IFNGR1* | interferon gamma receptor 1 | 0.299 | 0.006 | 0.090 |
| *IGF2R* | insulin-like growth factor 2 receptor | -0.549 | 0.002 | 0.046 |
| *IL17RA* | interleukin 17 receptor A | -0.360 | 0.007 | 0.095 |
| *IL2RB* | interleukin 2 receptor, beta | -0.422 | 0.008 | 0.099 |
| *IL6R* | interleukin 6 receptor | -0.351 | 0.008 | 0.099 |
| *INPP5D* | inositol polyphosphate-5-phosphatase, 145kDa | -0.235 | 0.002 | 0.040 |
| *ITGA2B* | integrin, alpha 2b (platelet glycoprotein IIb of IIb/IIIa complex, antigen CD41) | -1.223 | <.001 | 0.029 |
| *ITGA5* | integrin, alpha 5 (fibronectin receptor, alpha polypeptide) | -0.380 | <.001 | 0.030 |
| *ITGAE* | integrin, alpha E (antigen CD103, human mucosal lymphocyte antigen 1; alpha polypeptide) | 0.411 | <.001 | 0.017 |
| *ITGAM* | integrin, alpha M (complement component 3 receptor 3 subunit) | -0.425 | 0.001 | 0.040 |
| *JAK1* | Janus kinase 1 | -0.286 | <.001 | 0.029 |
| *KIR2DL1* | killer cell immunoglobulin-like receptor, two domains, long cytoplasmic tail, 1 | -0.652 | 0.003 | 0.058 |
| *LAMP1* | lysosomal-associated membrane protein 1 | -0.379 | <.001 | 0.014 |
| *LY96* | lymphocyte antigen 96 | 0.633 | 0.008 | 0.099 |
| *MAP2K1* | mitogen-activated protein kinase kinase 1 | -0.235 | 0.004 | 0.067 |
| *MAP3K1* | mitogen-activated protein kinase kinase kinase 1, E3 ubiquitin protein ligase | -0.232 | 0.003 | 0.058 |
| *MAP3K7* | mitogen-activated protein kinase kinase kinase 7 | 0.124 | 0.007 | 0.095 |
| *MAVS* | mitochondrial antiviral signaling protein | -0.212 | 0.002 | 0.041 |
| *NFATC1* | nuclear factor of activated T-cells, cytoplasmic, calcineurin-dependent 1 | -0.359 | <.001 | 0.002 |
| *NOTCH1* | notch 1 | -0.448 | 0.006 | 0.085 |
| *PIK3CD* | phosphatidylinositol-4,5-bisphosphate 3-kinase, catalytic subunit delta | -0.349 | <.001 | 0.029 |
| *REL* | v-rel reticuloendotheliosis viral oncogene homolog (avian) | 0.178 | 0.005 | 0.078 |
| *RELA* | v-rel reticuloendotheliosis viral oncogene homolog A (avian) | -0.269 | <.001 | 0.023 |
| *RPS6* | ribosomal protein S6 | 0.709 | <.001 | 0.022 |
| *S100A8* | S100 calcium binding protein A8 | 1.149 | 0.001 | 0.040 |
| *SELPLG* | selectin P ligand | -0.288 | 0.002 | 0.041 |
| *STAT3* | signal transducer and activator of transcription 3 (acute-phase response factor) | -0.290 | 0.006 | 0.085 |
| *TANK* | TRAF family member-associated NFKB activator | 0.362 | 0.001 | 0.040 |
| *TAP2* | transporter 2, ATP-binding cassette, sub-family B (MDR/TAP) | -0.452 | 0.004 | 0.068 |
| *TAPBP* | TAP binding protein (tapasin) | -0.370 | 0.002 | 0.040 |
| *TCF7* | transcription factor 7 (T-cell specific, HMG-box) | -0.284 | 0.007 | 0.096 |
| *TGFB1* | transforming growth factor, beta 1 | -0.431 | <.001 | 0.031 |
| *THBS1* | thrombospondin 1 | -0.836 | 0.003 | 0.057 |
| *TNFRSF1B* | tumor necrosis factor receptor superfamily, member 1B | -0.320 | 0.006 | 0.085 |
| *XCL2* | chemokine (C motif) ligand 2 | 0.499 | 0.007 | 0.096 |

**Supplementary Table 2. Differentially abundant metabolites in LC cases versus controls at the post-infection timepoint, identified by two-tailed *t*-test (*p* < 0.05) and *limma* (FDR < 0.05).**

| **t.stat** | **P value** | **Metabolites** | **Log FC** | **Average Expression** | **P value** | **FDR** |
| --- | --- | --- | --- | --- | --- | --- |
| 4.6768 | 0.0009 | 1,2-Dilinoleoylglycerol | 2.854 | 7.769 | 0 | 0.009 |
| 2.8419 | 0.0175 | 1,2-Dihexadecanoyl-sn-glycero-3-phosphocholine | 1.027 | 14.302 | 0.012 | 0.044 |
| -2.365 | 0.0396 | 2,3-DIHYDROXYBENZOATE | -2.348 | 9.808 | 0.038 | 0.044 |
| 2.4853 | 0.0322 | Butanoic acid, 4-[(1,2-dioxohexadecyl)amino]-, ethyl ester | 2.302 | 8.025 | 0.022 | 0.044 |
| 2.4688 | 0.0332 | DEOXYURIDINE | 1.47 | 11.631 | 0.023 | 0.044 |
| -2.3966 | 0.0375 | GLUTAMINE | -1.561 | 9.509 | 0.027 | 0.044 |
| 2.3819 | 0.0385 | HYPOXANTHINE | 0.625 | 12.787 | 0.032 | 0.044 |
| -3.3103 | 0.0079 | INDOLE-3-ACETATE | -0.63 | 13.546 | 0.007 | 0.044 |
| -2.2444 | 0.0486 | INDOLE-3-METHYL ACETATE | -2.229 | 7.922 | 0.035 | 0.044 |
| -2.8317 | 0.0178 | LAUROYLCARNITINE | -2.604 | 7.945 | 0.011 | 0.044 |
| -2.5778 | 0.0275 | L-CARNITINE | -0.51 | 11.582 | 0.026 | 0.044 |
| -2.3657 | 0.0396 | N-ACETYLASPARAGINE | -1.561 | 9.971 | 0.028 | 0.044 |
| 2.8372 | 0.0176 | N-ACETYLCYSTEINE | 0.438 | 14.384 | 0.02 | 0.044 |
| -2.9055 | 0.0157 | N-ACETYLGLUCOSAMINE | -0.961 | 15.136 | 0.011 | 0.044 |
| 3.0193 | 0.0129 | OXOADIPATE | 2.162 | 8.732 | 0.008 | 0.044 |
| 2.4087 | 0.0368 | OXOGLUTARATE | 0.415 | 10.84 | 0.038 | 0.044 |
| -3.2334 | 0.009 | THIAMINE MONOPHOSPHATE | -0.391 | 11.544 | 0.014 | 0.044 |
| 2.889 | 0.0161 | THREONINE | 0.26 | 17.942 | 0.039 | 0.044 |
| 2.6227 | 0.0255 | TRICOSANOATE | 0.509 | 12.97 | 0.024 | 0.044 |
| 2.3453 | 0.041 | TRYPTOPHAN | 1.148 | 15.536 | 0.03 | 0.044 |
| 2.9554 | 0.0144 | UREIDOPROPIONATE | 0.301 | 13.849 | 0.028 | 0.044 |
| 2.6256 | 0.0254 | ALLOTHREONINE | 0.279 | 15.307 | 0.044 | 0.048 |
| 2.5065 | 0.0311 | ASPARAGINE | 0.282 | 12.131 | 0.049 | 0.051 |
| -2.6441 | 0.0246 | QUINOLINATE | -0.217 | 10.794 | 0.064 | 0.064 |

**Supplementary Table 3. Longitudinal metabolite changes from pre- to post-infection in LC cases and controls assessed by linear mixed-effects models (p < 0.05)**

| **Metabolite** | **p_value_interaction** | **p_adj_FDR_interaction** |
| --- | --- | --- |
| OXOGLUTARATE | 0.001 | 0.023 |
| OXOADIPATE | 0.016 | 0.195 |
| THREONINE | 0.033 | 0.264 |

**Supplementary table 4. KEGG pathway enrichment analysis of integrated transcriptomic and metabolomic data (FDR < 0.05)**

| **Pathway** | **Total** | **Expected** | **Hits** | **P.Value** | **FDR** |
| --- | --- | --- | --- | --- | --- |
| Alanine, aspartate and glutamate metabolism | 36 | 0.298 | 8 | 3.52e-10 | 1.12e-07 |
| Arginine biosynthesis | 21 | 0.174 | 6 | 1.24e-08 | 1.97e-06 |
| Th17 cell differentiation | 107 | 0.885 | 9 | 1.93e-07 | 2.04e-05 |
| Hepatitis B | 163 | 1.35 | 10 | 7.43e-07 | 5.91e-05 |
| HTLV-I infection | 219 | 1.81 | 11 | 1.45e-06 | 9.19e-05 |
| Carbon metabolism | 116 | 0.96 | 8 | 4.41e-06 | 0.000212 |
| Epstein-Barr virus infection | 201 | 1.66 | 10 | 4.99e-06 | 0.000212 |
| D-Glutamine and D-glutamate metabolism | 5 | 0.0414 | 3 | 5.34e-06 | 0.000212 |
| Osteoclast differentiation | 128 | 1.06 | 8 | 9.17e-06 | 0.000304 |
| Th1 and Th2 cell differentiation | 92 | 0.761 | 7 | 9.56e-06 | 0.000304 |
| RIG-I-like receptor signaling pathway | 70 | 0.579 | 6 | 2.19e-05 | 0.000588 |
| Tryptophan metabolism | 42 | 0.347 | 5 | 2.22e-05 | 0.000588 |
| Antigen processing and presentation | 77 | 0.637 | 6 | 3.78e-05 | 0.000925 |
| Necroptosis | 162 | 1.34 | 8 | 5.08e-05 | 0.00115 |
| Kaposi's sarcoma-associated herpesvirus infection | 186 | 1.54 | 8 | 0.000134 | 0.00285 |
| HIF-1 signaling pathway | 100 | 0.827 | 6 | 0.000164 | 0.00326 |
| Inflammatory bowel disease (IBD) | 65 | 0.538 | 5 | 0.000186 | 0.00349 |
| TNF signaling pathway | 110 | 0.91 | 6 | 0.000276 | 0.00488 |
| Toxoplasmosis | 113 | 0.935 | 6 | 0.00032 | 0.0052 |
| Nitrogen metabolism | 17 | 0.141 | 3 | 0.000338 | 0.0052 |
| Leishmaniasis | 74 | 0.612 | 5 | 0.000343 | 0.0052 |
| Pancreatic cancer | 75 | 0.62 | 5 | 0.000365 | 0.00528 |
| EGFR tyrosine kinase inhibitor resistance | 79 | 0.653 | 5 | 0.000465 | 0.00643 |
| MAPK signaling pathway | 295 | 2.44 | 9 | 0.000655 | 0.00869 |
| Natural killer cell mediated cytotoxicity | 131 | 1.08 | 6 | 0.000705 | 0.00896 |
| Proximal tubule bicarbonate reclamation | 23 | 0.19 | 3 | 0.00085 | 0.0104 |
| Measles | 138 | 1.14 | 6 | 0.000926 | 0.0109 |
| Hematopoietic cell lineage | 97 | 0.802 | 5 | 0.00119 | 0.0133 |
| Pyrimidine metabolism | 57 | 0.472 | 4 | 0.00121 | 0.0133 |
| Viral carcinogenesis | 201 | 1.66 | 7 | 0.00127 | 0.0135 |
| T cell receptor signaling pathway | 101 | 0.835 | 5 | 0.00142 | 0.0146 |
| Metabolic pathways | 1430 | 11.8 | 22 | 0.00179 | 0.0177 |
| Citrate cycle (TCA cycle) | 30 | 0.248 | 3 | 0.00187 | 0.018 |
| Cellular senescence | 160 | 1.32 | 6 | 0.00198 | 0.0186 |
| PI3K-Akt signaling pathway | 354 | 2.93 | 9 | 0.00235 | 0.0214 |
| Serotonergic synapse | 115 | 0.951 | 5 | 0.00252 | 0.0223 |
| Cytokine-cytokine receptor interaction | 294 | 2.43 | 8 | 0.00275 | 0.0236 |
| Biosynthesis of amino acids | 75 | 0.62 | 4 | 0.00334 | 0.0276 |
| NOD-like receptor signaling pathway | 178 | 1.47 | 6 | 0.00338 | 0.0276 |
| Chronic myeloid leukemia | 76 | 0.629 | 4 | 0.0035 | 0.0278 |
